# Supplementary material for: Genomic analysis of variability in Delta-toxin levels between Staphylococcus aureus strains
Source: PeerJ. 2020 Mar 24;8:e8717. doi: 10.7717/peerj.8717 (PMC7100594; doi:10.7717/peerj.8717)
Supplement: Table S1 — Metadata for S. aureus strains including sequencing and genome assembly statistics as well as ST/CC, Agr type, MRSA status, delta-toxin HPLC values and any available data on isolation. [file peerj-08-8717-s004.xlsx]

## Sheet: Updated With SRA Info
NID	SRA Experiment Accession	Sequence Model	Total Reads	Total Basepair	Estimated Coverage (x)	Total Contigs	N50	ST	CC	MRSA	Agr	Strain	Delta toxin (Total Peak Area mAU2)	Year	Sex	Age	Locale	Country	Isolation_site
NRS001	SRX1114452;SRX7142943	Illumina MiSeq;HiSeq X Ten	37179004	5166695149	1835.54	66	103013	5	5	TRUE	2	Mu50	0	1996	M	4 mo		Japan	pus and debrided tissue at surgical incision in sternum
NRS002	SRX1116071	Illumina MiSeq	627596	136755297	48.5841	786	6493	5	5	TRUE	2	Mu3	0	1996				Japan	sputum from lung cancer patient with MRSA pneumonia
NRS003	SRX1116072	Illumina MiSeq	497886	105365042	37.4323	872	5245	5	5	TRUE	2	HIP5827	0	1997	M	59	Michigan	USA	diabetic dialysis patient with peritonitis
NRS021	SRX1116073	Illumina MiSeq	924558	211054750	74.9799	264	54067	8	8	TRUE	1	HIP07920	473.152	1999	M	43	Rhode Island	USA	ICU patient with bacteremia with a history of a transjugular intrahepatic portosystemic shunt,
NRS022	SRX1116074	Illumina MiSeq	822092	176832644	62.8221	391	23471	45	45	FALSE	1	HIP07930	6686.81	1999	F		New York	USA	ICU patient
NRS027	SRX1116075	Illumina MiSeq	987608	207190825	73.6072	287	24415	8	8	TRUE	1	HIP09433	24153.7	2000	F	77	Michigan	USA	ICU patient
NRS029	SRX1116076	Illumina MiSeq	774288	153217266	54.4324	608	10052	36	30	TRUE	3	HIP09735	1703.41	2000	M	64	North Carolina	USA	ICU inpatient
NRS035	SRX1116077	Illumina MiSeq	692992	144288908	51.2605	689	7757	572	8	TRUE	1	LIM1	41.9975	1995	F	2		France	patient with leukemia
NRS036	SRX1116078;SRX7142944	Illumina MiSeq;HiSeq X Ten	23250748	3614552538	1284.11	270	69327	247	8	TRUE	1	LIM2	10925	1995	F	2		France	patient with leukemia
NRS039	SRX1116079	Illumina MiSeq	7513948	747767438	265.654	173	59824	247	8	TRUE	1	99.3795.V	142.513	1999			Scotland	United Kingdom	ICU inpatient
NRS049	SRX1116080	Illumina MiSeq	989194	189877003	67.4563	285	20231	5	5	TRUE	2	NRS49	0	1997	M	45		South Korea	blood of cancer patient with septicemia
NRS051	SRX1116081	Illumina MiSeq	889862	187694313	66.6808	72	179023	5	5	TRUE	2	HIP09740	11951.9	2000	F	27	California	USA	patient who had a history of acute cholecystitis, complicated cholecystectomy
NRS054	SRX1116083	Illumina MiSeq	842692	169238745	60.1243	535	10068	239	239	TRUE	1	BR15	3907.39	1998	M	8		Brazil	wound of burn patient
NRS063	SRX1116084	Illumina MiSeq	694706	145635109	51.7388	604	10789	372	239	FALSE	1	NRS63	0
NRS064	SRX1116085	Illumina MiSeq	762262	145134315	51.5609	805	6452	372	239	TRUE	1	LY-19990620-02	0	1998	F	50		Oman	patient with septicemia who had a history of diabetes mellitus, chronic renal failure, renal transplant with subsequent rejection, wound and catheter infections
NRS070	SRX1116086	Illumina MiSeq	919642	166198304	59.0441	1184	5221	5	5	TRUE	2	N315	1006.18	1982				Japan	pharyngeal smear
NRS071	SRX1116087	Illumina MiSeq	667582	139550716	49.5772	358	15994	36	30	TRUE	3	MRSA 252	1980.88	1997	F	64			postoperative MRSA infection
NRS072	SRX1116088	Illumina MiSeq	1129846	235383117	83.6229	147	53225	1	1	FALSE	3	MSSA 476	10651	1998	M	9			community-acquired primary upper tibial osteomyelitis and bacteremia
NRS073	SRX1116089;SRX7142946	Illumina MiSeq;HiSeq X Ten	73638570	11247446685	3995.8	312	62456	8	8	TRUE	1	HIP10540	5931.41	2000	M		Ohio	USA
NRS074	SRX1116090	Illumina MiSeq	9735952	993717678	353.031	122	103526	105	5	TRUE	2	HIP10267	105.807	2000	M	30	Maryland	USA	bloodstream
NRS079	SRX1116091	Illumina MiSeq	497768	96579659	34.3112	941	4813	231	5	TRUE	NA	IL (Isolate F)	4336.96	1999	F	63	Illinois	USA	patient with bacteremia and a history of end-stage renal disease, intravascular access, failed arteriovenous grafts, multiple central venous catheter-associated infections
NRS100	SRX1116092	Illumina MiSeq	1120942	253338402	90.0018	263	86825	250	8	TRUE	1	COL	2036.4	1961			London	United Kingdom
NRS102	SRX1116093	Illumina MiSeq	1087952	204896800	72.7923	570	11777	25	25	FALSE	1	Reynolds	15695.7	1979			California	USA	human blood culture
NRS103	SRX1116094	Illumina MiSeq	892592	165293366	58.7226	663	7654	508	45	FALSE	1	Becker	62816.6	1979				USA	human blood culture
NRS104	SRX1116095	Illumina MiSeq	1054232	213203500	75.7433	343	16111	30	30	FALSE	3	Cowan I, NCTC8530	67.8931	1935			New York	USA	septic arthritis
NRS105	SRX1116096	Illumina MiSeq	712016	155634499	55.2912	336	47796	97	97	FALSE	1	Wood 46	20522.3
NRS106	SRX1116097	Illumina MiSeq	1203294	249731415	88.7203	183	62450	8	8	FALSE	1	RN4220/pG01	4970.08
NRS107	SRX1116098	Illumina MiSeq	1109600	198161964	70.3996	676	14547	8	8	FALSE	2	RN4220/pG0400	4138.51
NRS108	SRX1116099	Illumina MiSeq	634378	134984987	47.9552	521	10411	8	8	TRUE	NA	A960649	8502.7					France	clinical isolate
NRS109	SRX1116100	Illumina MiSeq	6947400	680507504	241.759	23	206809	47	45	FALSE	1	FRI361	24092	1962			England	United Kingdom	cooked chicken implicated in a food poisoning outbreak
NRS110	SRX1116101	Illumina MiSeq	1268998	169230493	60.1213	160	38960	5	5	FALSE	2	FRI472	17026.5					USA	turkey salad implicated in a food poisoning outbreak
NRS111	SRX1116102	Illumina MiSeq	2842724	297558250	105.711	535	21977	395	395	FALSE	1	FRI913	11908.6					USA	food associated with an outbreak of staphylococcal food poisoning
NRS112	SRX1116103	Illumina MiSeq	837092	190320425	67.6138	179	53641	30	30	FALSE	3	MN8	12759	1980			Minnesota	USA	toxic-shock syndrome
NRS113	SRX1116104	Illumina MiSeq	855038	193062408	68.5879	72	118858	10	10	FALSE	2	MNDON	305.524						blood from patient with toxic-shock syndrome
NRS114	SRX1116105	Illumina MiSeq	509804	111111985	39.474	304	21324	8	8	FALSE	1	MNHOCH	22232.4					USA	non-menstrual toxic shock syndrome
NRS119	SRX1116106;SRX7142947	Illumina MiSeq;HiSeq X Ten	75165988	11187102000	3974.37	144	100273	507	8	TRUE	1	SALinR#12	3091.42	2001	M	85	Massachusetts	USA	dialysis-associated peritonitis
NRS145	SRX1116107	Illumina MiSeq	492894	114311924	40.6108	247	29251	8	8	FALSE	1	RN4282	15778.2				Minnesota	USA
NRS148	SRX1116108	Illumina MiSeq	429006	101357082	36.0084	162	44271	121	707	FALSE	3	RN6432, Smith Diffuse	2326.34
NRS149	SRX1116109	Illumina MiSeq	790792	169649431	60.2702	241	28385	5	5	FALSE	2	RN6607, 502A	15645.4						nares of nurse
NRS152	SRX1116110	Illumina MiSeq	830508	181427498	64.4545	162	46817	8	8	FALSE	1	RN7044, WGB4316	142.719
NRS157	SRX1116111	Illumina MiSeq	899562	191842936	68.1547	557	26118	22	22	FALSE	1	A980592	17770.7		F	14		France	necrotizing pneumonia
NRS161	SRX1116112	Illumina MiSeq	797006	179482237	63.7634	148	42414	22	22	FALSE	1	HT20000509	151.707		M	26		France	skin infection
NRS162	SRX1116113	Illumina MiSeq	1233314	272861168	96.9375	173	83775	30	30	FALSE	3	HT20000328	3876.02	2000	F	11		France	skin infection
NRS164	SRX1116114	Illumina MiSeq	1002546	214279544	76.1256	191	51911	15	15	FALSE	2	A890259	19366.1					France	wound
NRS167	SRX1116115	Illumina MiSeq	736400	163139102	57.9573	212	44047	1446	22	FALSE	1	A970675	20944.8		F			France	exfoliative toxin-mediated bullous impetigo
NRS168	SRX1116116;SRX7142948	Illumina MiSeq;HiSeq X Ten	50142776	7540879464	2679	545	11123	45	45	FALSE	4	A850375	25184.2	1985	M			France	enterotoxin-mediated disease
NRS169	SRX1116117	Illumina MiSeq	696626	151548946	53.8397	227	25404	45	45	FALSE	1	A920222	46904.4	1992				France	enterotoxin-mediated disease
NRS170	SRX1116118	Illumina MiSeq	665990	143590154	51.0123	170	39198	10	10	FALSE	2	A960562	8498.37	2002	M	37		France	enterotoxin-mediated disease
NRS172	SRX1116119	Illumina MiSeq	514402	115815999	41.1451	196	33667	8	8	TRUE	1	A970230	14848.5	1997	M			France	purulent sputum from scarlet fever
NRS174	SRX1116120	Illumina MiSeq	2025338	412279960	146.468	598	9188	30	30	FALSE	3	A900507	2872.48	1990	F			France	Pus associated with nonmenstrual TSS
NRS175	SRX1116121	Illumina MiSeq	725356	163036586	57.9209	126	52062	72	72	FALSE	1	A910565	26117.9	1991	F	15		France	nonmenstrual TSS
NRS177	SRX1116122	Illumina MiSeq	1017772	218545371	77.6411	88	116200	34	30	FALSE	3	A960197	2415.35	1996	F			France	urine associated with nonmenstrual TSS
NRS178	SRX1116123	Illumina MiSeq	1101598	212068790	75.3402	675	8725	49	49	FALSE	2	A910469	3654.44	1991	M	2		France	scarlet fever
NRS180	SRX1116124	Illumina MiSeq	463284	97134440	34.5083	423	14677	30	30	FALSE	3	A960254	3163	1996	F	4		France	scarlet fever
NRS182	SRX1116125	Illumina MiSeq	459796	94005322	33.3966	882	4897	12	12	FALSE	2	A950085	7945.4	1995	F	34		France	endocarditis
NRS183	SRX1116126	Illumina MiSeq	774384	161418155	57.3459	229	26240	15	15	FALSE	2	A980101	4343.31	1998	F	16		France	endocarditis
NRS185	SRX1116127	Illumina MiSeq	634846	138880268	49.339	348	19366	121	121	FALSE	4	A890511	17317.9	1989		8		France	suppurative infections (cellulitis and/or myositis)
NRS187	SRX1116128	Illumina MiSeq	797444	182540828	64.85	198	33591	25	25	FALSE	1	A860325	8728.54	1986	F			France	osteitis and/or osteomyelitis
NRS188	SRX1116129	Illumina MiSeq	684686	148158401	52.6352	329	18639	1447	5	FALSE	2	A950206	14072.7	1995	M	42		France	osteitis and/or osteomyelitis
NRS189	SRX1116130	Illumina MiSeq	506220	114385960	40.6371	228	41699	34	30	FALSE	3	A910371	4874.71	1991	M	16		France	suppurative arthritis
NRS191	SRX1116131	Illumina MiSeq	772346	143503137	50.9814	854	5532	34	30	FALSE	3	A970698	2155.74	1997	F	45		France	suppurative arthritis
NRS192	SRX1116132	Illumina MiSeq	550970	104825831	37.2407	1207	3229	1	1	TRUE	3	C1998000370	3565.49	1997	F	7	Minnesota	USA	hip/blood, associated with septic arthritis, sepsis and pneumonia,empyema
NRS194	SRX1116133	Illumina MiSeq	474384	96259905	34.1976	444	13085	1	1	TRUE	3	C1999000529	4238.09	1999	M	1	North Dakota	USA	pleural fluid, associated necrotizing pneumonia and severe sepsis
NRS196	SRX1116134	Illumina MiSeq	689196	130484864	46.3564	404	13189	30	30	FALSE	3	No.49	8106.49					United Kingdom
NRS198	SRX1116135	Illumina MiSeq	649896	151151519	53.6985	96	70029	254	8	FALSE	1	No.56	2597.22	1949				United Kingdom
NRS199	SRX1116136	Illumina MiSeq	1030912	232648983	82.6516	117	86292	890	890	FALSE	4	No.66	97234.8	1947				United Kingdom
NRS201	SRX1116137	Illumina MiSeq	658434	146815322	52.1581	255	26145	254	8	FALSE	1	No.150	16117.8					United Kingdom
NRS202	SRX1116138	Illumina MiSeq	544588	122210894	43.417	150	84153	254	8	FALSE	1	No.152	16863.9
NRS203	SRX1116139	Illumina MiSeq	962272	193844903	68.8659	185	36375	846	846	FALSE	3	No.153	3531.55					United Kingdom
NRS204	SRX1116140	Illumina MiSeq	496202	100496950	35.7029	529	10405	30	30	FALSE	3	No.167, NCTC6571	889.909	1940				United Kingdom
NRS205	SRX1116141	Illumina MiSeq	940904	183622996	65.2345	99	142251	707	707	FALSE	3	No.208	0					United Kingdom
NRS207	SRX1116142	Illumina MiSeq	799164	165276117	58.7165	206	38927	30	30	FALSE	3	No.229	5870.9					United Kingdom
NRS209	SRX1116143	Illumina MiSeq	473916	103264073	36.6859	625	8216	247	8	TRUE	1	No.315	17.3077	1971	M			United Kingdom	trachea
NRS210	SRX1116144	Illumina MiSeq	1086412	252219683	89.6043	139	48124	30	30	FALSE	3	No.326, KCM187	3202.45					United Kingdom
NRS211	SRX1116145	Illumina MiSeq	829392	183360952	65.1414	222	43065	8	8	FALSE	1	No.333	29741.1					United Kingdom
NRS212	SRX1116146	Illumina MiSeq	556018	125270639	44.504	123	65031	30	30	FALSE	3	No.344	8055.58	1957				United Kingdom
NRS213	SRX1116147	Illumina MiSeq	1368268	274537776	97.5331	137	43665	30	30	FALSE	3	No.348, 605E, G2	8289.91	1958				United Kingdom
NRS214	SRX1116148	Illumina MiSeq	835416	178629506	63.4605	174	43862	8	8	FALSE	1	No.359	20168.4					United Kingdom
NRS215	SRX1116149	Illumina MiSeq	600294	125613094	44.6257	242	22325	121	121	FALSE	4	No.425	23560.6					United Kingdom	abscess
NRS216	SRX1116150	Illumina MiSeq	898028	181940515	64.6367	176	35868	30	30	FALSE	3	No.426	8300.13					United Kingdom	burn
NRS217	SRX1116151	Illumina MiSeq	591146	134430217	47.7581	204	36358	121	121	FALSE	4	No.430	6777.8					United Kingdom	osteomyelitis
NRS218	SRX1116152	Illumina MiSeq	1485076	298579617	106.074	350	20484	247	8	TRUE	1	No.437	15900.1					United Kingdom
NRS219	SRX1116153	Illumina MiSeq	522698	102082564	36.2662	221	30058	30	30	FALSE	3	No.536, NCTC9789, PS80	59.0167	1974				United Kingdom
NRS220	SRX1116154	Illumina MiSeq	783902	160175690	56.9045	76	128476	97	97	FALSE	1	No.611	1210					United Kingdom
NRS222	SRX1116155	Illumina MiSeq	574180	119212701	42.3519	294	24554	30	30	FALSE	3		291.834	1978				United Kingdom
NRS223	SRX1116156	Illumina MiSeq	724500	121229208	43.0683	790	5887	30	30	FALSE	3	No.784	3967.66					United Kingdom
NRS224	SRX1116157	Illumina MiSeq	794338	163745138	58.1726	294	60643	97	97	FALSE	1	No.690, NAG9	10629.9					United Kingdom
NRS225	SRX1116158	Illumina MiSeq	478316	109207362	38.7973	449	11338	121	121	FALSE	4	No.691	16851.9					United Kingdom
NRS226	SRX1116159	Illumina MiSeq	436598	101476507	36.0508	289	27374	1	1	FALSE	3	HT20020028	55.7836	2002	M	3 mo		France	myositis
NRS227	SRX1116160	Illumina MiSeq	597794	140168394	49.7966	196	42168	25	25	FALSE	1	HT20020030	39538.6		M	4 mo		France	hip arthritis with TSS
NRS230	SRX1116161	Illumina MiSeq	670790	153518067	54.5393	455	25943	121	121	FALSE	3	HT20020057	39950.6	2002	M	2 yr 4 mo		France	elbow arthritis with scarlet fever
NRS231	SRX1116162	Illumina MiSeq	604622	138185825	49.0923	370	38976	30	30	FALSE	3	HT20020058	3148.03	2002	F	7		France	arthritic knee joint
NRS232	SRX1116163	Illumina MiSeq	809886	180448779	64.1068	3140	2578	22	22	FALSE	2	HT20020065	25353.9	2002	M	4		France	necrotizing pneumonia
NRS233	SRX1116164	Illumina MiSeq	540764	115114564	40.8959	370	31627	582	15	FALSE	2	HT20020067	14365.3	2002	F	1 mo		France	bullous impetigo
NRS235	SRX1116165	Illumina MiSeq	531166	115308205	40.9647	560	15294	22	22	FALSE	1	HT20020075	634.538	2002	M	5		France	valve endocarditis
NRS236	SRX1116166	Illumina MiSeq	539158	117064667	41.5887	423	20842	45	45	FALSE	1	HT20020141	20045.5	2002	M	1 mo		France	bacteremia
NRS237	SRX1116167	Illumina MiSeq	421256	94113904	33.4352	371	17510	121	121	FALSE	4	HT20020167	9992.65		F	5 yr 5 mo		France	necrotising pneumonia
NRS239	SRX1116168;SRX7142949	Illumina MiSeq;HiSeq X Ten	47404582	7259650861	2579.08	103	76574	121	121	FALSE	4	HT20020204	17973.7		M	3 mo		France	generalized exfoliative syndrome
NRS240	SRX1116169	Illumina MiSeq	700170	154011393	54.7146	364	38123	5	5	FALSE	2	HT20020229	39564.7	2002	M	1 yr 6 mo		Frabce	osteitis
NRS241	SRX1116170	Illumina MiSeq	550060	124287539	44.1548	178	41759	59	59	TRUE	1	HT20020233	12480.2	2002	M	2 mo		France	scarlet fever associated with varicella
NRS242	SRX1116171	Illumina MiSeq	579286	123848461	43.9988	787	11490	121	121	FALSE	4	HT20020238	16706	2002	F	1 yr 2 mo		France	impetigo
NRS243	SRX1116172	Illumina MiSeq	594574	128056586	45.4938	256	31573	59	59	FALSE	1	HT20020252	20713.5	2002	F	3 yr 8 mo		France	pneumonia
NRS245	SRX1116173	Illumina MiSeq	429048	95403139	33.8932	193	35189	59	59	TRUE	1	HT20020320	11264	2002	F	8		France	impetigo
NRS246	SRX1116174	Illumina MiSeq	477014	102671011	36.4752	496	10151	30	30	FALSE	3	HT20020330	1243.1	2002	M	1 mo		France	node abscess
NRS247	SRX1116175	Illumina MiSeq	466736	100487348	35.6994	615	8305	34	30	FALSE	3	HT20020331	13707.9	2002	F	5 mo		France	cutaneous abscess
NRS248	SRX1116176	Illumina MiSeq	621182	137130321	48.7173	274	31054	1	1	TRUE	3	HT20020341	14588.6	2002	M	5		France	native valve endocarditis
NRS249	SRX1116177	Illumina MiSeq	556684	127048439	45.1356	658	20174	247	8	TRUE	3	HT20020365	27604.2	2002	F	8		France	impetigo and scarlet fever
NRS252	SRX1116178	Illumina MiSeq	445572	100505962	35.7061	388	15767	30	30	FALSE	3	HT20020351	8172.82
NRS253	SRX1422904	Illumina MiSeq	2300194	317101488	112.654	74	118060	398	398	FALSE	1	HT 20020354	5845.3	2002	M	4 yr 2 mo		France	bacteremia
NRS254	SRX1422905	Illumina MiSeq	2120104	249405656	88.6046	114	74643	8	8	TRUE	1	HT20020376	11266	2002	F	5 mo		France	bullous impetigo
NRS255	SRX1422906	Illumina MiSeq	1623336	221426448	78.6646	139	56092	80	80	TRUE	3	HT20020371	17668.4	2002	M	3 mo		France	furunculosis
NRS256	SRX1116179	Illumina MiSeq	429286	92928505	33.0141	720	6517	109	9	FALSE	2	HT20020372	13315.7	2002	F	2 mo		France	bulbous impetigo after varicella
NRS259	SRX1116180	Illumina MiSeq	514540	113989671	40.4963	776	6307	121	121	FALSE	4	HT20020381	9829.18	2002	F	6 mo		France	bulbous impetigo
NRS260	SRX1116181	Illumina MiSeq	411306	93325893	33.1552	462	12682	25	25	FALSE	1	HT20020455	3745.49	2002	F	5 mo		France	generalized exfoliative syndrome
NRS262	SRX1116182	Illumina MiSeq	427566	99475889	35.3401	227	29664	188	1	FALSE	1	HT20020420	13984.1	2002	M			France	necrotising pneumonia
NRS264	SRX1116183	Illumina MiSeq	2196388	261897409	93.0425	393	67244	34	30	FALSE	3	HT20020438	0	2002	M	8 yr 2 mo		France	bacteremia with multiple abscess
NRS265	SRX1116184	Illumina MiSeq	582610	124680617	44.2944	817	5979	88	88	TRUE	3	HT20020444	7130.8	2002				Switzerland	bulbous impetigo
NRS266	SRX1116185	Illumina MiSeq	674036	148632836	52.8037	476	11476	121	121	FALSE	4	HT20020470	17972	2002	F	1 mo		France	impetigo and scarlet fever
NRS271	SRX1116187	Illumina MiSeq	530738	110386652	39.2163	1162	3352	22	22	TRUE	NA	P1V44	18169.6	1999	F	18		Belgium	sputum sample of cystic fibrosis patient
NRS272	SRX1116188	Illumina MiSeq	591446	122770514	43.6158	1048	4276	247	8	TRUE	1	160013	15672.6	2002	M	46		United Kingdom	blood of ICU patient
NRS275	SRX1116189	Illumina MiSeq	500420	114279893	40.5994	513	13729	254	8	FALSE	1	No.55-2	9560.68					United Kingdom
NRS383	SRX1116190	Illumina MiSeq	545130	123997268	44.0516	164	40509	36	30	TRUE	3	USA300-0114	2600.72				Mississippi	USA	wound
NRS386	SRX1116191	Illumina MiSeq	3034776	293832635	104.388	88	89196	72	72	TRUE	1	1045	20275.4				Washington	USA	wound
NRS387	SRX1116192	Illumina MiSeq	7374422	697613810	247.836	62	106614	5	5	TRUE	2	HIP12864	14382.5	2003	M	78	Oklahoma	USA	bloodstream

## Sheet: Sheet1
NRS001	66	103013
NRS002	786	6493
NRS003	872	5245
NRS021	264	54067
NRS022	391	23471
NRS027	287	24415
NRS029	608	10052
NRS035	689	7757
NRS036	270	69327
NRS039	173	59824
NRS049	285	20231
NRS051	72	179023
NRS054	535	10068
NRS063	604	10789
NRS064	805	6452
NRS070	1184	5221
NRS071	358	15994
NRS072	147	53225
NRS073	312	62456
NRS074	122	103526
NRS079	941	4813
NRS100	263	86825
NRS102	570	11777
NRS103	663	7654
NRS104	343	16111
NRS105	336	47796
NRS106	183	62450
NRS107	676	14547
NRS108	521	10411
NRS109	23	206809
NRS110	160	38960
NRS111	535	21977
NRS112	179	53641
NRS113	72	118858
NRS114	304	21324
NRS119	144	100273
NRS145	247	29251
NRS148	162	44271
NRS149	241	28385
NRS152	162	46817
NRS157	557	26118
NRS161	148	42414
NRS162	173	83775
NRS164	191	51911
NRS167	212	44047
NRS169	227	25404
NRS170	170	39198
NRS172	196	33667
NRS174	598	9188
NRS175	126	52062
NRS177	88	116200
NRS178	675	8725
NRS180	423	14677
NRS182	882	4897
NRS183	229	26240
NRS185	348	19366
NRS187	198	33591
NRS188	329	18639
NRS189	228	41699
NRS191	854	5532
NRS192	1207	3229
NRS194	444	13085
NRS196	404	13189
NRS198	96	70029
NRS199	117	86292
NRS201	255	26145
NRS202	150	84153
NRS203	185	36375
NRS204	529	10405
NRS205	99	142251
NRS207	206	38927
NRS209	625	8216
NRS210	139	48124
NRS211	222	43065
NRS212	123	65031
NRS213	137	43665
NRS214	174	43862
NRS215	242	22325
NRS216	176	35868
NRS217	204	36358
NRS218	350	20484
NRS219	221	30058
NRS220	76	128476
NRS222	294	24554
NRS223	790	5887
NRS224	294	60643
NRS225	449	11338
NRS226	289	27374
NRS227	196	42168
NRS230	455	25943
NRS231	370	38976
NRS232	3140	2578
NRS233	370	31627
NRS235	560	15294
NRS236	423	20842
NRS237	371	17510
NRS239	103	76574
NRS240	364	38123
NRS241	178	41759
NRS242	787	11490
NRS243	256	31573
NRS245	193	35189
NRS246	496	10151
NRS247	615	8305
NRS248	274	31054
NRS249	658	20174
NRS252	388	15767
NRS253	74	118060
NRS254	114	74643
NRS255	139	56092
NRS256	720	6517
NRS259	776	6307
NRS260	462	12682
NRS262	227	29664
NRS264	393	67244
NRS265	817	5979
NRS266	476	11476
NRS271	1162	3352
NRS272	1048	4276
NRS275	513	13729
NRS383	164	40509
NRS386	88	89196
NRS387	62	106614

## Sheet: NARSA1_annotated
NID	ST	CC	MRSA	Strain	Year	Sex	Age	Locale	Country	Isolation_site
NRS1	5	5	TRUE	Mu50	1996	M	4 mo		Japan	pus and debrided tissue at surgical incision in sternum
NRS2	5	5	TRUE	Mu3	1996				Japan	sputum from lung cancer patient with MRSA pneumonia
NRS3	5	5	TRUE	HIP5827	1997	M	59	Michigan	USA	diabetic dialysis patient with peritonitis
NRS21	8	8	TRUE	HIP07920	1999	M	43	Rhode Island	USA	ICU patient with bacteremia with a history of a transjugular intrahepatic portosystemic shunt,
NRS22	45	45	FALSE	HIP07930	1999	F		New York	USA	ICU patient
NRS27	8	8	TRUE	HIP09433	2000	F	77	Michigan	USA	ICU patient
NRS29	36	30	TRUE	HIP09735	2000	M	64	North Carolina	USA	ICU inpatient
NRS35	572	8	TRUE	LIM1	1995	F	2		France	patient with leukemia
NRS36	247	8	TRUE	LIM2	1995	F	2		France	patient with leukemia
NRS39	247	8	TRUE	99.3795.V	1999			Scotland	United Kingdom	ICU inpatient
NRS49	5	5	TRUE	NRS49	1997	M	45		South Korea	blood of cancer patient with septicemia
NRS51	5	5	TRUE	HIP09740	2000	F	27	California	USA	patient who had a history of acute cholecystitis, complicated cholecystectomy
NRS54	239	239	TRUE	BR15	1998	M	8		Brazil	wound of burn patient
NRS63	372	239	FALSE	NRS63
NRS64	372	239	TRUE	LY-19990620-02	1998	F	50		Oman	patient with septicemia who had a history of diabetes mellitus, chronic renal failure, renal transplant with subsequent rejection, wound and catheter infections
NRS70	5	5	TRUE	N315	1982				Japan	pharyngeal smear
NRS71	36	30	TRUE	MRSA 252	1997	F	64			postoperative MRSA infection
NRS72	1	1	FALSE	MSSA 476	1998	M	9			community-acquired primary upper tibial osteomyelitis and bacteremia
NRS73	8	8	TRUE	HIP10540	2000	M		Ohio	USA
NRS74	105	5	TRUE	HIP10267	2000	M	30	Maryland	USA	bloodstream
NRS79	231	5	TRUE	IL (Isolate F)	1999	F	63	Illinois	USA	patient with bacteremia and a history of end-stage renal disease, intravascular access, failed arteriovenous grafts, multiple central venous catheter-associated infections
NRS100	250	8	TRUE	COL	1961			London	United Kingdom
NRS102	25	25	FALSE	Reynolds	1979			California	USA	human blood culture
NRS103	508	45	FALSE	Becker	1979				USA	human blood culture
NRS104	30	30	FALSE	Cowan I, NCTC8530	1935			New York	USA	septic arthritis
NRS105	97	97	FALSE	Wood 46
NRS106	8	8	FALSE	RN4220/pG01
NRS107	8	8	FALSE	RN4220/pG0400
NRS108	8	8	TRUE	A960649					France	clinical isolate
NRS109	47	45	FALSE	FRI361	1962			England	United Kingdom	cooked chicken implicated in a food poisoning outbreak
NRS110	5	5	FALSE	FRI472					USA	turkey salad implicated in a food poisoning outbreak
NRS111	395	395	FALSE	FRI913					USA	food associated with an outbreak of staphylococcal food poisoning
NRS112	30	30	FALSE	MN8	1980			Minnesota	USA	toxic-shock syndrome
NRS113	10	10	FALSE	MNDON						blood from patient with toxic-shock syndrome
NRS114	8	8	FALSE	MNHOCH					USA	non-menstrual toxic shock syndrome
NRS119	507	8	TRUE	SALinR#12	2001	M	85	Massachusetts	USA	dialysis-associated peritonitis
NRS145	8	8	FALSE	RN4282				Minnesota	USA
NRS148	121	707	FALSE	RN6432, Smith Diffuse
NRS149	5	5	FALSE	RN6607, 502A						nares of nurse
NRS152	8	8	FALSE	RN7044, WGB4316
NRS157	22	22	FALSE	A980592		F	14		France	necrotizing pneumonia
NRS161	22	22	FALSE	HT20000509		M	26		France	skin infection
NRS162	30	30	FALSE	HT20000328	2000	F	11		France	skin infection
NRS164	15	15	FALSE	A890259					France	wound
NRS167	1446	22	FALSE	A970675		F			France	exfoliative toxin-mediated bullous impetigo
NRS168	45	45	FALSE	A850375	1985	M			France	enterotoxin-mediated disease
NRS169	45	45	FALSE	A920222	1992				France	enterotoxin-mediated disease
NRS170	10	10	FALSE	A960562	2002	M	37		France	enterotoxin-mediated disease
NRS172	8	8	TRUE	A970230	1997	M			France	purulent sputum from scarlet fever
NRS174	30	30	FALSE	A900507	1990	F			France	Pus associated with nonmenstrual TSS
NRS175	72	72	FALSE	A910565	1991	F	15		France	nonmenstrual TSS
NRS177	34	30	FALSE	A960197	1996	F			France	urine associated with nonmenstrual TSS
NRS178	49	49	FALSE	A910469	1991	M	2		France	scarlet fever
NRS180	30	30	FALSE	A960254	1996	F	4		France	scarlet fever
NRS182	12	12	FALSE	A950085	1995	F	34		France	endocarditis
NRS183	15	15	FALSE	A980101	1998	F	16		France	endocarditis
NRS185	121	121	FALSE	A890511	1989		8		France	suppurative infections (cellulitis and/or myositis)
NRS187	25	25	FALSE	A860325	1986	F			France	osteitis and/or osteomyelitis
NRS188	1447	5	FALSE	A950206	1995	M	42		France	osteitis and/or osteomyelitis
NRS189	34	30	FALSE	A910371	1991	M	16		France	suppurative arthritis
NRS191	34	30	FALSE	A970698	1997	F	45		France	suppurative arthritis
NRS192	1	1	TRUE	C1998000370	1997	F	7	Minnesota	USA	hip/blood, associated with septic arthritis, sepsis and pneumonia,empyema
NRS194	1	1	TRUE	C1999000529	1999	M	1	North Dakota	USA	pleural fluid, associated necrotizing pneumonia and severe sepsis
NRS196	30	30	FALSE	No.49					United Kingdom
NRS198	254	8	FALSE	No.56	1949				United Kingdom
NRS199	890	890	FALSE	No.66	1947				United Kingdom
NRS201	254	8	FALSE	No.150					United Kingdom
NRS202	254	8	FALSE	No.152
NRS203	846	846	FALSE	No.153					United Kingdom
NRS204	30	30	FALSE	No.167, NCTC6571	1940				United Kingdom
NRS205	707	707	FALSE	No.208					United Kingdom
NRS207	30	30	FALSE	No.229					United Kingdom
NRS209	247	8	TRUE	No.315	1971	M			United Kingdom	trachea
NRS210	30	30	FALSE	No.326, KCM187					United Kingdom
NRS211	8	8	FALSE	No.333					United Kingdom
NRS212	30	30	FALSE	No.344	1957				United Kingdom
NRS213	30	30	FALSE	No.348, 605E, G2	1958				United Kingdom
NRS214	8	8	FALSE	No.359					United Kingdom
NRS215	121	121	FALSE	No.425					United Kingdom	abscess
NRS216	30	30	FALSE	No.426					United Kingdom	burn
NRS217	121	121	FALSE	No.430					United Kingdom	osteomyelitis
NRS218	247	8	TRUE	No.437					United Kingdom
NRS219	30	30	FALSE	No.536, NCTC9789, PS80	1974				United Kingdom
NRS220	97	97	FALSE	No.611					United Kingdom
NRS222	30	30	FALSE		1978				United Kingdom
NRS223	30	30	FALSE	No.784					United Kingdom
NRS224	97	97	FALSE	No.690, NAG9					United Kingdom
NRS225	121	121	FALSE	No.691					United Kingdom
NRS226	1	1	FALSE	HT20020028	2002	M	3 mo		France	myositis
NRS227	25	25	FALSE	HT20020030		M	4 mo		France	hip arthritis with TSS
NRS230	121	121	FALSE	HT20020057	2002	M	2 yr 4 mo		France	elbow arthritis with scarlet fever
NRS231	30	30	FALSE	HT20020058	2002	F	7		France	arthritic knee joint
NRS232	22	22	FALSE	HT20020065	2002	M	4		France	necrotizing pneumonia
NRS233	582	15	FALSE	HT20020067	2002	F	1 mo		France	bullous impetigo
NRS235	22	22	FALSE	HT20020075	2002	M	5		France	valve endocarditis
NRS236	45	45	FALSE	HT20020141	2002	M	1 mo		France	bacteremia
NRS237	121	121	FALSE	HT20020167		F	5 yr 5 mo		France	necrotising pneumonia
NRS239	121	121	FALSE	HT20020204		M	3 mo		France	generalized exfoliative syndrome
NRS240	5	5	FALSE	HT20020229	2002	M	1 yr 6 mo		Frabce	osteitis
NRS241	59	59	TRUE	HT20020233	2002	M	2 mo		France	scarlet fever associated with varicella
NRS242	121	121	FALSE	HT20020238	2002	F	1 yr 2 mo		France	impetigo
NRS243	59	59	FALSE	HT20020252	2002	F	3 yr 8 mo		France	pneumonia
NRS245	59	59	TRUE	HT20020320	2002	F	8		France	impetigo
NRS246	30	30	FALSE	HT20020330	2002	M	1 mo		France	node abscess
NRS247	34	30	FALSE	HT20020331	2002	F	5 mo		France	cutaneous abscess
NRS248	1	1	TRUE	HT20020341	2002	M	5		France	native valve endocarditis
NRS249	247	8	TRUE	HT20020365	2002	F	8		France	impetigo and scarlet fever
NRS252	30	30	FALSE	HT20020351
NRS253	398	398	FALSE	HT 20020354	2002	M	4 yr 2 mo		France	bacteremia
NRS254	8	8	TRUE	HT20020376	2002	F	5 mo		France	bullous impetigo
NRS255	80	80	TRUE	HT20020371	2002	M	3 mo		France	furunculosis
NRS256	109	9	FALSE	HT20020372	2002	F	2 mo		France	bulbous impetigo after varicella
NRS259	121	121	FALSE	HT20020381	2002	F	6 mo		France	bulbous impetigo
NRS260	25	25	FALSE	HT20020455	2002	F	5 mo		France	generalized exfoliative syndrome
NRS262	188	1	FALSE	HT20020420	2002	M			France	necrotising pneumonia
NRS264	34	30	FALSE	HT20020438	2002	M	8 yr 2 mo		France	bacteremia with multiple abscess
NRS265	88	88	TRUE	HT20020444	2002				Switzerland	bulbous impetigo
NRS266	121	121	FALSE	HT20020470	2002	F	1 mo		France	impetigo and scarlet fever
NRS271	22	22	TRUE	P1V44	1999	F	18		Belgium	sputum sample of cystic fibrosis patient
NRS272	247	8	TRUE	160013	2002	M	46		United Kingdom	blood of ICU patient
NRS275	254	8	FALSE	No.55-2					United Kingdom
NRS383	36	30	TRUE	USA300-0114				Mississippi	USA	wound
NRS386	72	72	TRUE	1045				Washington	USA	wound
NRS387	5	5	TRUE	HIP12864	2003	M	78	Oklahoma	USA	bloodstream
